# Supplementary material
Source: MDPI journal article supplement (https://www.mdpi.com/2079-8954/7/4/47)
Supplement: s1 [file s1]

Archive with 19 entries (16 files):
- Supplmentary_Material/SDMSS-Tool/
- Supplmentary_Material/SDMSS-Tool/jars/
- Supplmentary_Material/SDMSS-Tool/jars/lib/
- Supplmentary_Material/SDMSS-Tool/jars/lib/AbsoluteLayout.jar
- Supplmentary_Material/SDMSS-Tool/jars/lib/antlr4-runtime-4.5.3.jar
- Supplmentary_Material/SDMSS-Tool/jars/lib/commons-math3-3.6.1.jar
- Supplmentary_Material/SDMSS-Tool/jars/lib/Jama-1.0.3.jar
- Supplmentary_Material/SDMSS-Tool/jars/lib/jgraph-5.13.0.0.jar
- Supplmentary_Material/SDMSS-Tool/jars/lib/jgrapht-core-1.0.1.jar
- Supplmentary_Material/SDMSS-Tool/jars/lib/jgrapht-demo-1.0.1.jar
- Supplmentary_Material/SDMSS-Tool/jars/lib/jgrapht-ext-1.0.1.jar
- Supplmentary_Material/SDMSS-Tool/jars/lib/jgrapht-ext-1.0.1-uber.jar
- Supplmentary_Material/SDMSS-Tool/jars/lib/jgraphx-2.0.0.1.jar
- Supplmentary_Material/SDMSS-Tool/jars/lib/mtj-0.9.9.jar
- Supplmentary_Material/SDMSS-Tool/jars/Logo.png
- Supplmentary_Material/SDMSS-Tool/jars/SDMSS.jar
- Supplmentary_Material/SDMSS-Tool/README.TXT
- Supplmentary_Material/SDMSS-Tool/Tool_Run.bat
- Supplmentary_Material/Supporting_Information.pdf
