# Supplementary material
Source: MDPI journal article supplement (https://www.mdpi.com/2079-8954/7/4/47)
Supplement: s1 [file s1 › Supplmentary_Material/SDMSS-Tool/README.TXT]

Step1: Befor Running the Tool, Install Java SE Development Kit 8 From the Following Link:
http://www.oracle.com/technetwork/java/javase/downloads/jdk8-downloads-2133151.html 

Step2: Once the Installation is Finished, Double Click the Bat File with Name "Tool_Run.bat" to Run the Tool.
