# Supplementary material
Source: MDPI journal article supplement (https://www.mdpi.com/2079-8954/7/4/47)
Supplement: s1 [file s1 › Supplmentary_Material/SDMSS-Tool/Tool_Run.bat]

java -jar "./jars/SDMSS.jar"
